# Supplementary material for: CBP and Gcn5 drive zygotic genome activation independently of their catalytic activity
Source: PubMed Central journal article supplement — Sci Adv. 2023 Apr 21;9(16):eadf2687. doi: 10.1126/sciadv.adf2687 (PMC10121174; doi:10.1126/sciadv.adf2687), 2023-04-21
Supplement: sciadv.adf2687_sm.pdf [file sciadv.adf2687_sm.pdf]

Supplementary Materials for  
**CBP and Gcn5 drive zygotic genome activation independently of their  
catalytic activity**

Filippo Ciabrelli *et al.*

Corresponding author: Nicola Iovino, [iovino@ie-freiburg.mpg.de](mailto:iovino@ie-freiburg.mpg.de)

*Sci. Adv.* **9**, eadf2687 (2023)  
DOI: [10.1126/sciadv.adf2687](https://doi.org/10.1126/sciadv.adf2687)

**This PDF file includes:**

Figs. S1 to S8  
Tables S1 and S2

# Supplementary Figure 1

**A**

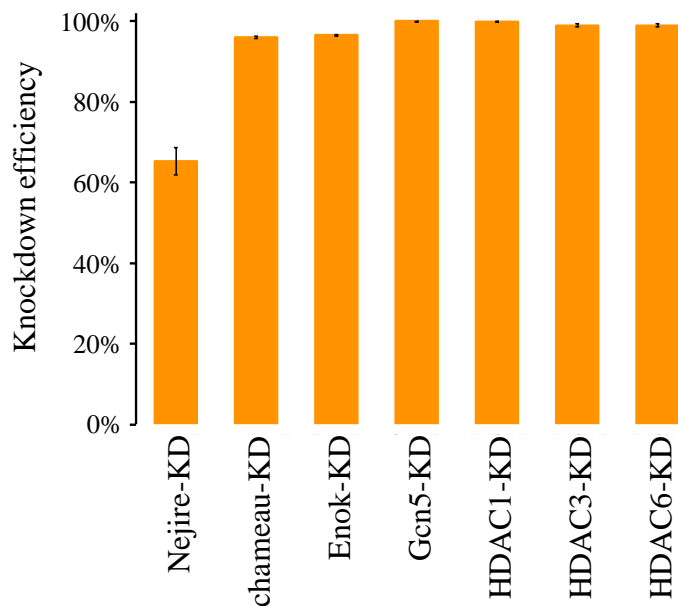

**B**

| Gene    | Name line    | ID line  | Type | CR    | HR    | PCLR   |
|---------|--------------|----------|------|-------|-------|--------|
| nejire  | shRNA line 1 | homemade | V20  | 35.0% | 0.0%  | 100.0% |
| nejire  | shRNA line 2 | BL36682  | V20  | 44.0% | 0.0%  | 100.0% |
| CONTROL | control      | BL36303  | -    | 98.0% | 95.0% | 3.1%   |

**C**

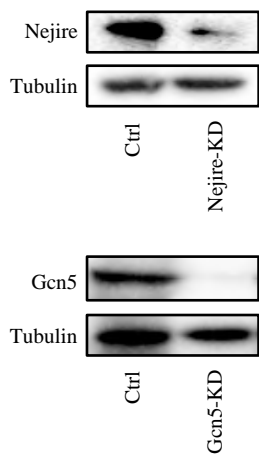

**D**

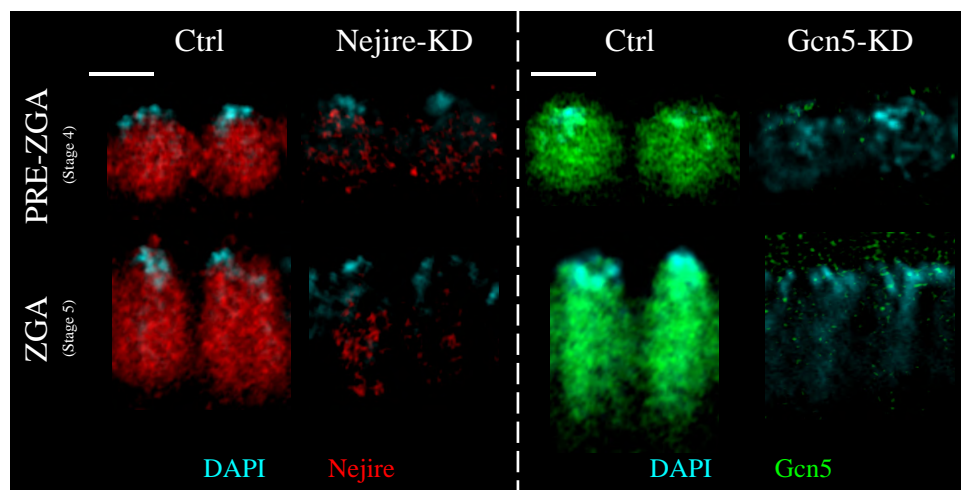

**E**

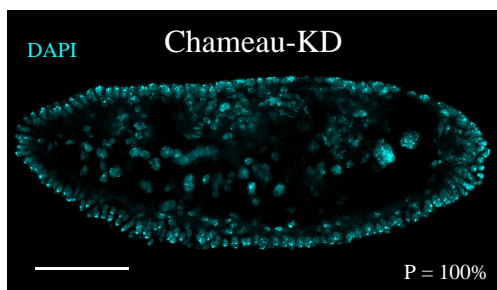

**F**

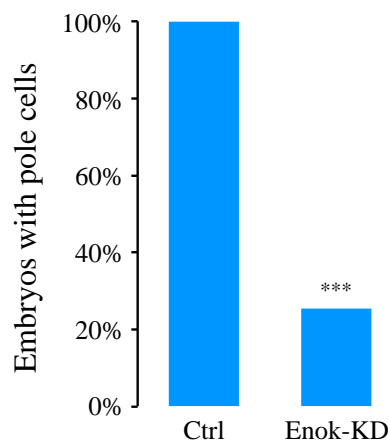

**Fig. S1. Knockdown efficiency and additional embryonic phenotypes upon maternal depletion.** (A) Knockdown efficiency of RNAi targets. Values correspond to the mean and error bar represent the standard deviation of RT-qPCR from  $n = 3$  biological replicates of independent embryo collections at ZGA. Values are calculated subtracting from 100% the relative level of target mRNA, normalized to RP49 mRNA levels, in a given knockdown compared to the control. (B) Cellularization rate (CR), hatching rate (HR) and post cellularization lethality rate (PCLR) of two Nejire shRNA lines and control. (C) Western blot assays performed with total protein extracts from PRE-ZGA embryos (stage 4). On the top, anti-Nejire and anti-Tubulin signals are compared in control and Nejire-KD extracts. On the bottom, anti-Gcn5 and anti-Tubulin signals are compared in control and Gcn5-KD. (D) Representative immunofluorescence pictures of PRE-ZGA (stage 4) (top) and ZGA (stage 5) (bottom) control and knockdown embryos. On the left, anti-Nejire staining (red) and on the right, anti-Gcn5 staining (green), are coupled with DAPI staining (cyan). (scale bar = 5  $\mu\text{m}$ ). (E) DAPI staining of representative Chameau knockdown embryo at ZGA. Scale bar = 100  $\mu\text{m}$ . Penetrance (P) indicates the frequency of observed embryos displaying abnormal phenotype. (F) Percentage of embryos displaying pole cells in control embryos ( $n = 47$ ) and in Enok-KD embryos ( $n = 51$ ) at ZGA. Fisher's exact test  $t$ -test \*\*\*  $p$ -value  $\leq 0.001$ .

# Supplementary Data Figure 2

**A**

## Maternal transcripts (6336)

Unfertilized eggs, RNA-seq

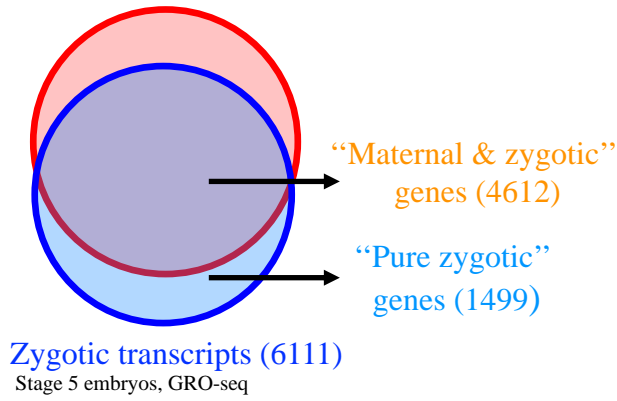

**B**

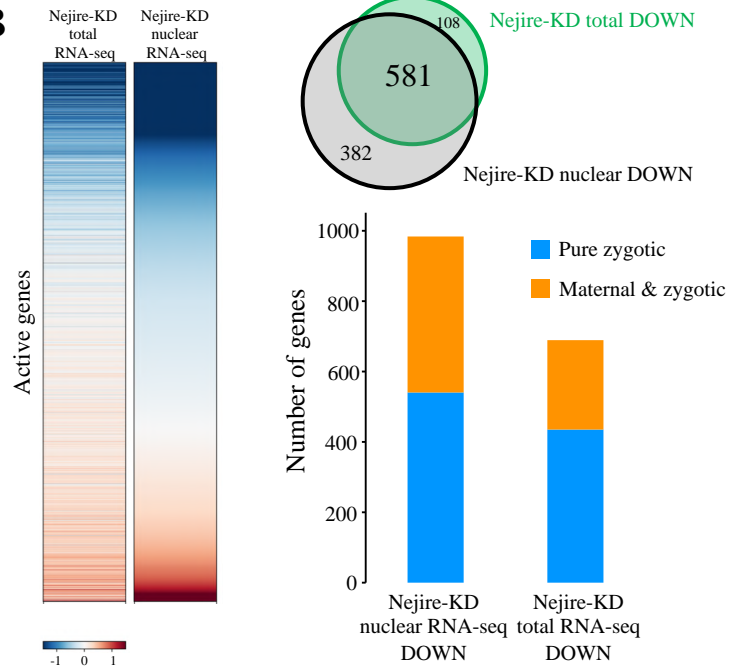

**C**

## Nejire and Gcn5 shared downregulated genes

| Symbol     | Zelda-dependent | GO_BIOLOGICAL_PROCESS                            |
|------------|-----------------|--------------------------------------------------|
| Cyp312a1   | yes             | -                                                |
| DIP-eta    | yes             | synapse organization                             |
| CG11905    | -               | -                                                |
| Adgf-A2    | -               | inosine biosynthetic process                     |
| Art2       | yes             | peptidyl-arginine methylation                    |
| Rab26      | -               | regulation of exocytosis                         |
| Cad99C     | yes             | cell-cell adhesion                               |
| dpr1       | -               | synapse organization                             |
| Notum      | yes             | Wnt signaling pathway                            |
| hbs        | -               | myoblast fusion                                  |
| zen2       | yes             | regulation of transcription by RNA polymerase II |
| mas        | yes             | axon development                                 |
| lov        | yes             | gravitaxis                                       |
| Neu2       | yes             | regulation of transcription by RNA polymerase II |
| RyR        | -               | calcium ion transport                            |
| tld        | yes             | BMP signaling pathway                            |
| scw        | yes             | BMP signaling pathway                            |
| CG6885     | yes             | -                                                |
| geko       | yes             | behavioral response to ethanol                   |
| satum      | -               | -                                                |
| Rpi        | -               | D-ribose metabolic process                       |
| CG13716    | yes             | regulation of localization                       |
| Mco1       | yes             | iron ion transport                               |
| CG16813    | yes             | -                                                |
| CG1146     | yes             | -                                                |
| CG7271     | yes             | -                                                |
| Ldh        | -               | carbohydrate metabolic process                   |
| Elba3      | yes             | heterochromatin boundary formation               |
| fd96Cb     | -               | Regulation of transcription by RNA polymerase II |
| pyd3       | -               | pyrimidine nucleobase catabolic process          |
| srw        | yes             | BMP signaling pathway                            |
| CG13712    | yes             | regulation of localization                       |
| CG14317    | yes             | proteolysis                                      |
| sc         | yes             | central nervous system development               |
| Obp99a     | yes             | response to pheromone                            |
| zen        | yes             | regulation of transcription by RNA polymerase II |
| ND-51L1    | yes             | mitochondrial electron transport                 |
| tsg        | yes             | BMP signaling pathway                            |
| dunk       | yes             | syncytial embryo cellularization                 |
| upd1       | yes             | JAK-STAT pathway                                 |
| Bro        | yes             | regulation of transcription by RNA polymerase II |
| nej        | -               | histone acetylation                              |
| CG9775     | yes             | -                                                |
| Tep2       | -               | innate immune response                           |
| alpha-Est1 | -               | -                                                |
| amos       | yes             | dendrite morphogenesis                           |
| D          | -               | dorsal/ventral axis specification                |
| CG13713    | yes             | regulation of localization                       |
| Cyp6a20    | -               | defense response to Gram-negative bacterium      |
| CG11034    | -               | proteolysis                                      |
| ph-d       | -               | negative regulation of transcription             |
| spri       | yes             | signal transduction                              |

34/52

Zelda-dependent

**D**

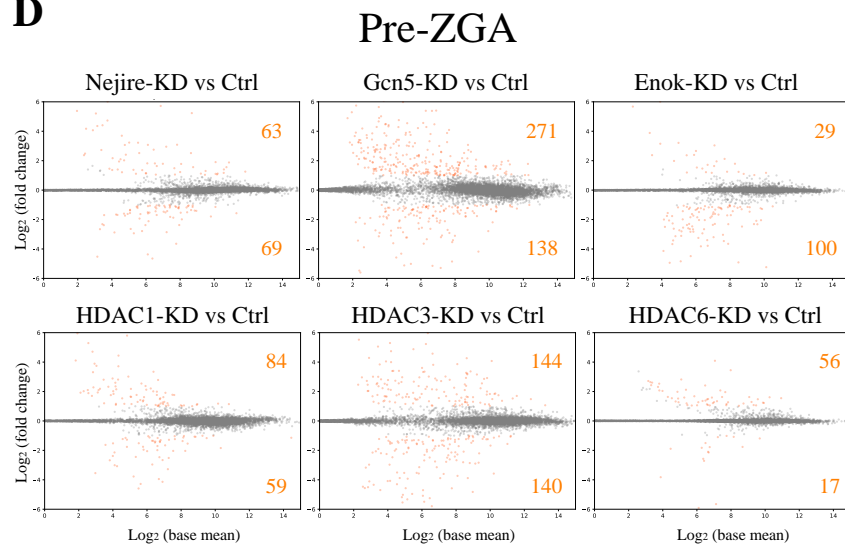

**E**

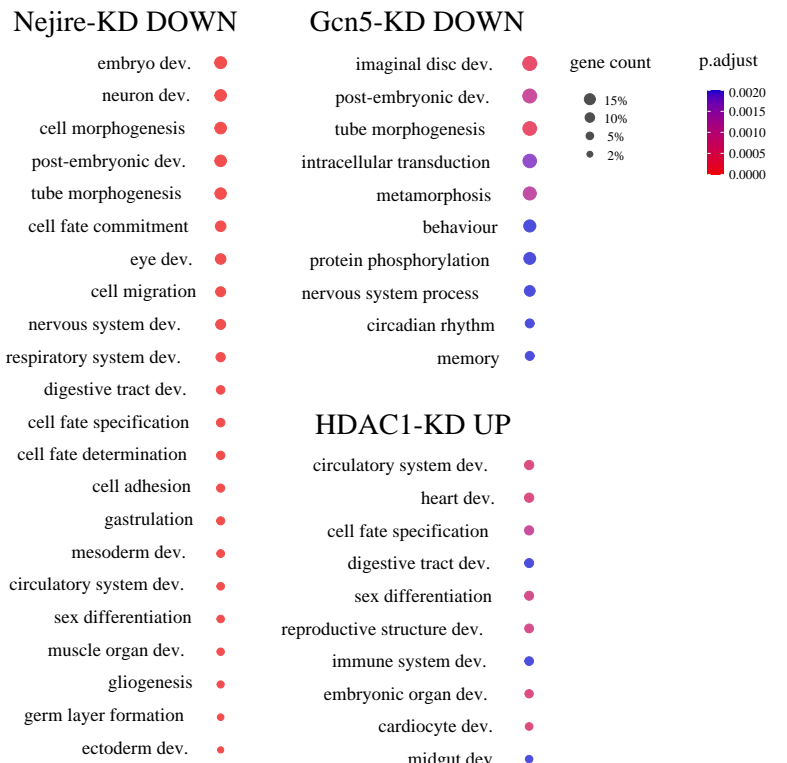

**Fig. S2. HATs and HDACs regulate different sets of genes during ZGA.** (A) “Maternal & Zygotic” and “Pure Zygotic” gene-classification based on the overlap between “Zygotic transcripts” (Genes displaying GRO-seq signal at ZGA (15) also defined as “active genes”) and “Maternal genes” (RNA-seq positive genes in unfertilized eggs (15)). In parenthesis the numbers of transcripts/genes for each category. (B) Comparison between total RNA-seq and nuclear RNA-seq between Nejire-KD and control at ZGA. On the left, a heatmap displaying the change in gene expression between Nejire-KD and control among active genes, ranked by the Nuclear RNA-seq wt/-KD ratio. Corresponding log2FC color-coded scale bars are depicted on the bottom. On the top right, Venn diagram displaying the overlap between the number of active genes significantly downregulated in Nejire-KD (adjusted  $p$ -value  $\leq 0.05$  and  $\log_2\text{FC} < -1$ ) in total RNA-seq (green) and the number of active genes significantly downregulated in Nejire-KD (adjusted  $p$ -value  $\leq 0.05$  and  $\log_2\text{FC} < -1$ ) in nuclear RNA-seq (black). On the bottom right, number of “Pure Zygotic” (blue) and “Maternal & Zygotic” (orange) genes (see fig. S2A for details) significantly downregulated in nuclear RNA-seq and total RNA-seq in Nejire-KD. (C) List of 52 overlapping genes between Nejire-dependent and Gcn5-dependent active genes at ZGA (adjusted  $p$ -value  $\leq 0.05$  and  $\log_2\text{FC} < -1$ ). Column 2 shows Zelda dependency (see (15) for details) and column 3 shows GO biological process. (D) MA plots displaying total RNA-seq experiments performed on Pre-ZGA (stage 2) embryos, comparing knockdown with Ctrl. Significantly misregulated genes (adjusted  $p$ -value  $\leq 0.05$  and  $\log_2\text{FC} < -1$  or  $\log_2\text{FC} > 1$ ) are highlighted in orange. The numbers of significantly upregulated or down regulated genes are shown above or below the  $\log_2\text{FC}$  mean expression = 0 line, respectively. (n = 2 biological replicates from independent embryo collections). e, Top GO terms are shown for HDAC1-KD upregulated (adjusted  $p$ -value  $\leq 0.05$  and  $\log_2\text{FC} > 1$ ) and Nejire or Gcn5 downregulated (adjusted  $p$ -value  $\leq 0.05$  and  $\log_2\text{FC} < -1$ ) active genes at ZGA. For each term, color intensity represents the adjusted  $p$ -value and dot size shows the number of genes which support the corresponding GO term.

# Supplementary Data Figure 3

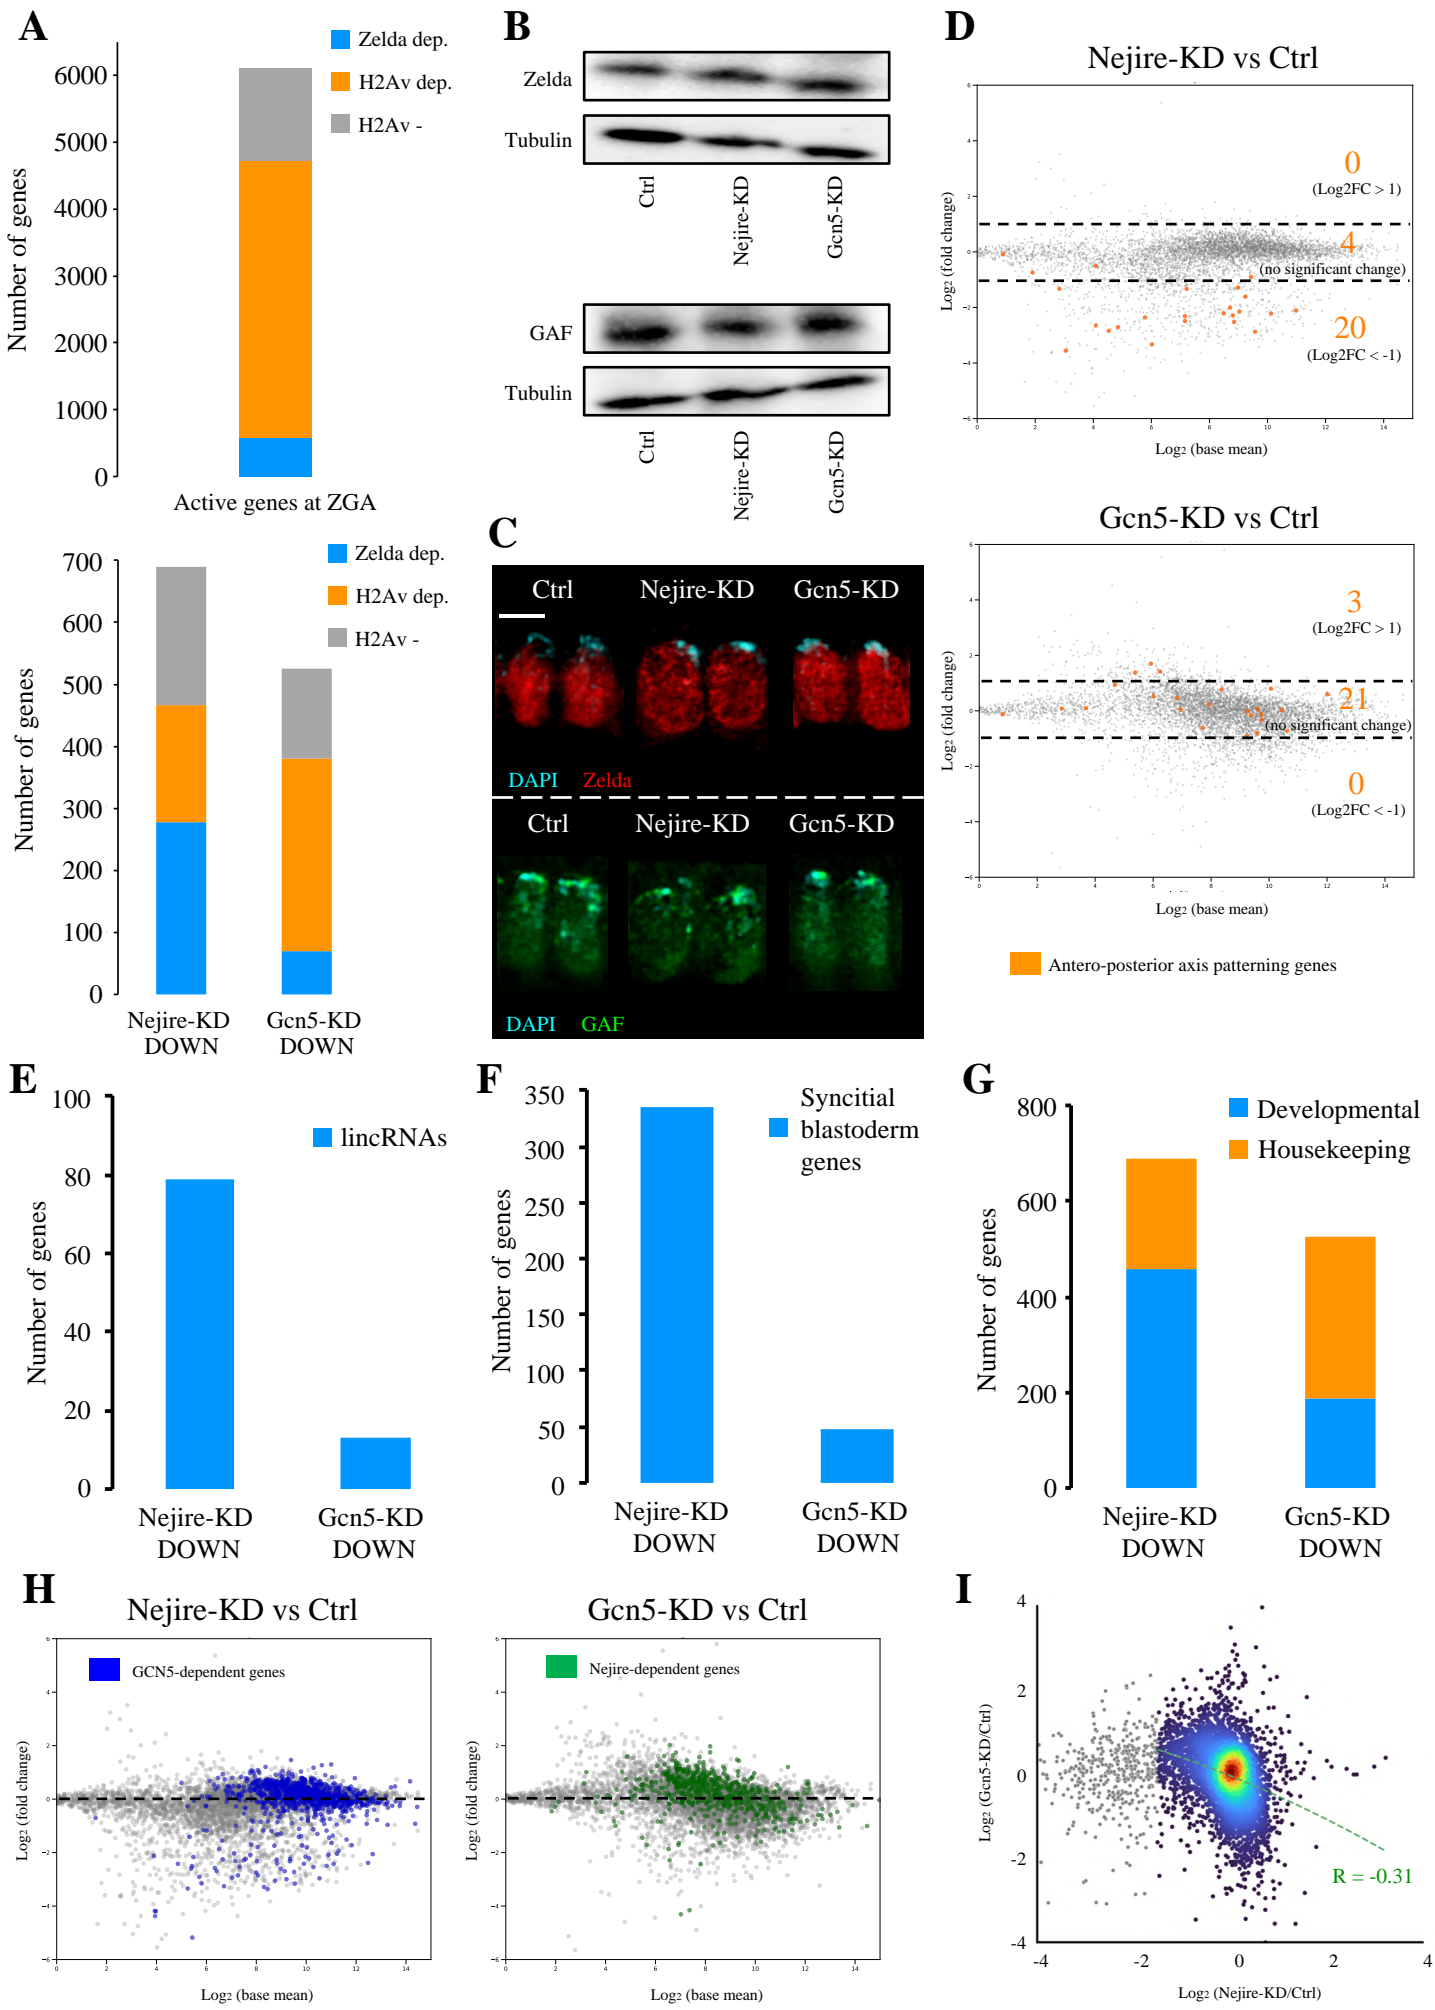

**Fig. S3. Nejire and Gcn5 regulate the expression of different sets of genes during ZGA.** (A) On the top, the number of Zelda-dependent (“Zelda dep.”, in blue), H2Av-dependent (“H2Av dep.”, in orange) and Zelda-independent/H2Av-independent (“H2Av –”, in grey) active genes (see ref. (15) for details) at ZGA. On the bottom, the Zelda/H2Av categorization applied to the genes significantly downregulated in total RNA-seq in Nejire-KD and in Gcn5-KD (adjusted  $p$ -value  $\leq 0.05$  and  $\log_2FC < -1$ ). (B) Western blot assays performed with total protein extracts from PRE-ZGA embryos (stage 4). On the top, anti-Zelda and anti-Tubulin, on the bottom, anti-GAF and anti-Tubulin signals are compared in control and Nejire-KD and Gcn5-KD embryonic extracts. (C) Representative immunofluorescence pictures of ZGA control, Nejire-KD and Gcn5-KD and knockdown embryos. On the top, anti-Zelda staining (red) and on the bottom, anti-GAF staining (green), are coupled with DAPI staining (cyan). (scale bar = 5  $\mu$ m). (D) MA plots displaying total RNA-seq experiments, comparing Nejire-KD (top) and Gcn5-KD (bottom) with Ctrl at ZGA. Highlighted in orange 24 early antero-posterior axis patterning genes (trunk gap genes, pair-rule genes, segment polarity genes and homeotic genes). Numbers indicate significantly upregulated, downregulated (adjusted  $p$ -value  $\leq 0.05$  and  $\log_2FC < -1$  or  $\log_2FC > 1$ ), and the not significantly affected among the 24 considered genes. (E) Number of lincRNA genes significantly downregulated (adjusted  $p$ -value  $\leq 0.05$  and  $\log_2FC < -1$ ) in Nejire-KD and Gcn5-KD compared to Ctrl at ZGA. (F) Number of “Syncytial blastoderm” expressed genes significantly downregulated in Nejire-KD and Gcn5-KD (adjusted  $p$ -value  $\leq 0.05$  and  $\log_2FC < -1$ ) among the 510 genes still expressed at ZGA. (see (15) and (8) for details). (G) Number of “Developmental” (blue) and “Housekeeping” (orange) genes significantly downregulated (adjusted  $p$ -value  $\leq 0.05$  and  $\log_2FC < -1$ ) in Nejire-KD and Gcn5-KD at ZGA. Genes are defined as “Housekeeping” when their expression is higher than the 40<sup>th</sup> percentile in each of the 30 distinct developmental conditions tested in modEncode RNA-Seq (81). All the other genes are considered as “Developmental”. (H) MA plots of total RNA-seq experiments, comparing Nejire knockdown (left) and Gcn5 knockdown (right) with Ctrl embryos at ZGA. Only active genes are displayed (see fig. S2A and ref. (15) for details). In blue, significantly downregulated genes (adjusted  $p$ -value  $\leq 0.05$  and  $\log_2FC < -1$ ) in Gcn5-KD are overlaid in the Nejire-KD vs Ctrl MA plot on the left. In green, significantly downregulated genes (adjusted  $p$ -value  $\leq 0.05$  and  $\log_2FC < -1$ ) in Nejire-KD are overlaid in the Gcn5-KD vs Ctrl MA plot on the right. (I), Scatter plot displaying active genes  $\log_2FC$  in Nejire-KD (x-axis) versus Gcn5-KD (y-axis) at ZGA. Strong Nejire targets ( $\log_2FC < -1.5$  in Nejire-KD) are highlighted in grey. Dashed green trendline shows the anticorrelation ( $R = -0.31$ ) between Nejire-KD and Gcn5-KD of the fold change in gene expression among the rest of active genes ( $\log_2FC > -1.5$  in Nejire-KD).

# Supplementary Data Figure 4

A

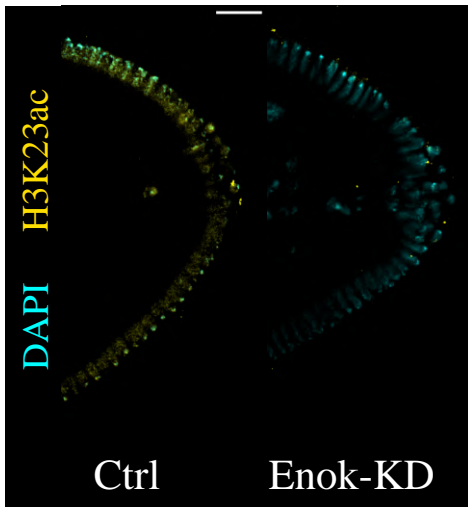

B

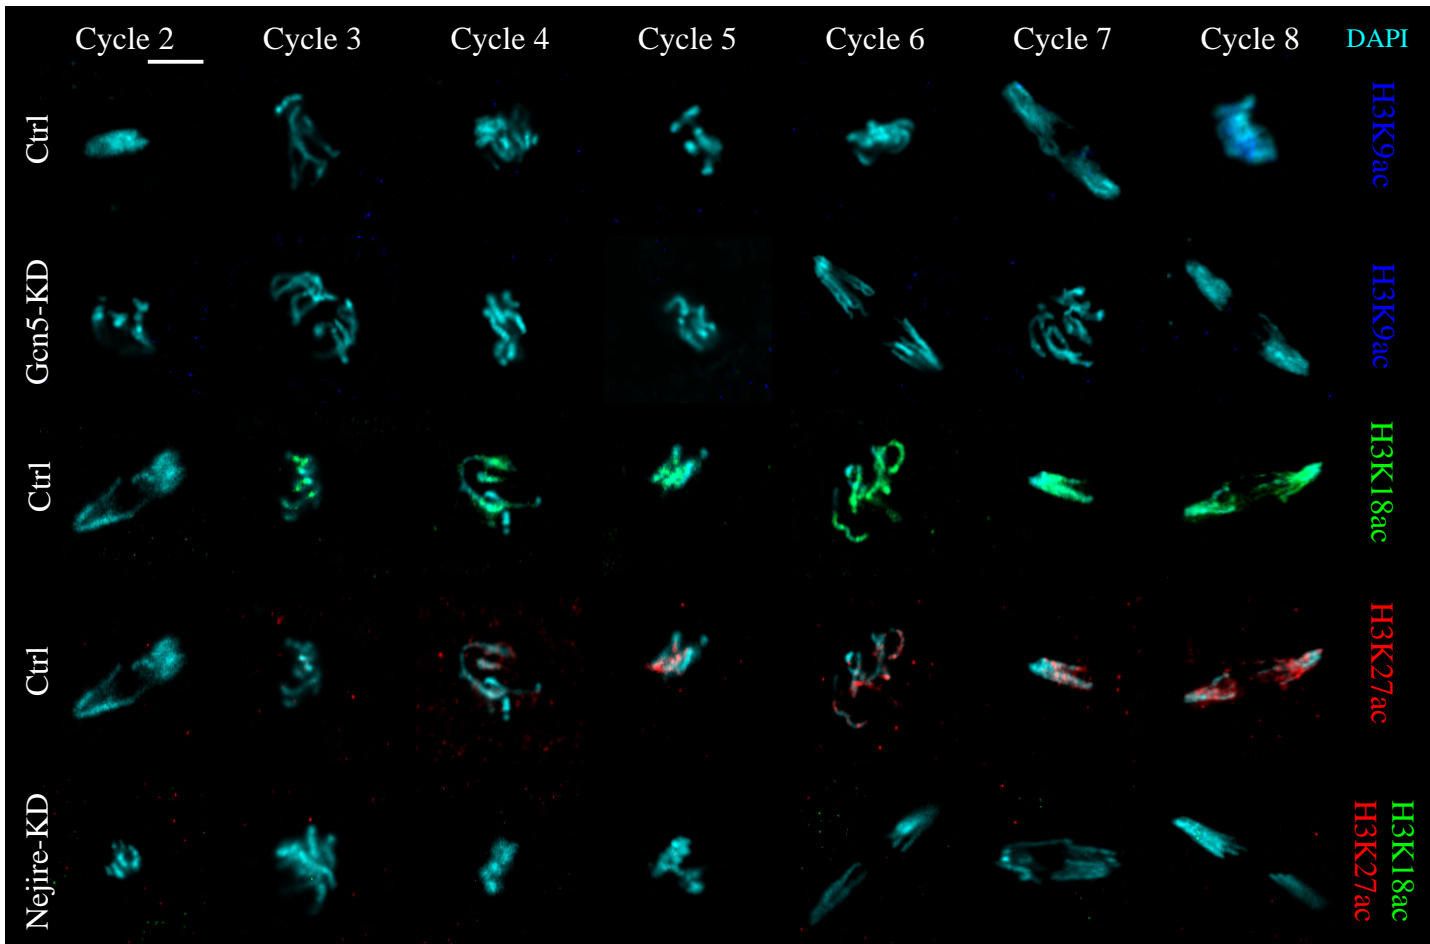



**Fig. S4. H3K9-, H3K18- and H3K27ac deposition precede the first wave of ZGA.** (A) Representative pictures of posterior side control embryo (left) and Enok-KD embryo (right) stained with anti-H3K23ac (yellow), and DAPI (cyan) at ZGA. Scale bar = 20  $\mu$ m. (B) Representative pictures of mitotic nuclei from cycle 2 to cycle 8 of embryogenesis (scale bar = 5  $\mu$ m). On the top, control embryos and Gcn5-KD embryos stained with anti-H3K9ac (blue) and DAPI (cyan). On the bottom, control embryos stained with anti-H3K18ac (green) and DAPI; control embryos stained with anti-H3K27ac (red) and DAPI (cyan); Nejire-KD embryos stained with anti-H3K18ac (green), anti-H3K27ac (red) and DAPI (cyan).

# Supplementary Data Figure 5

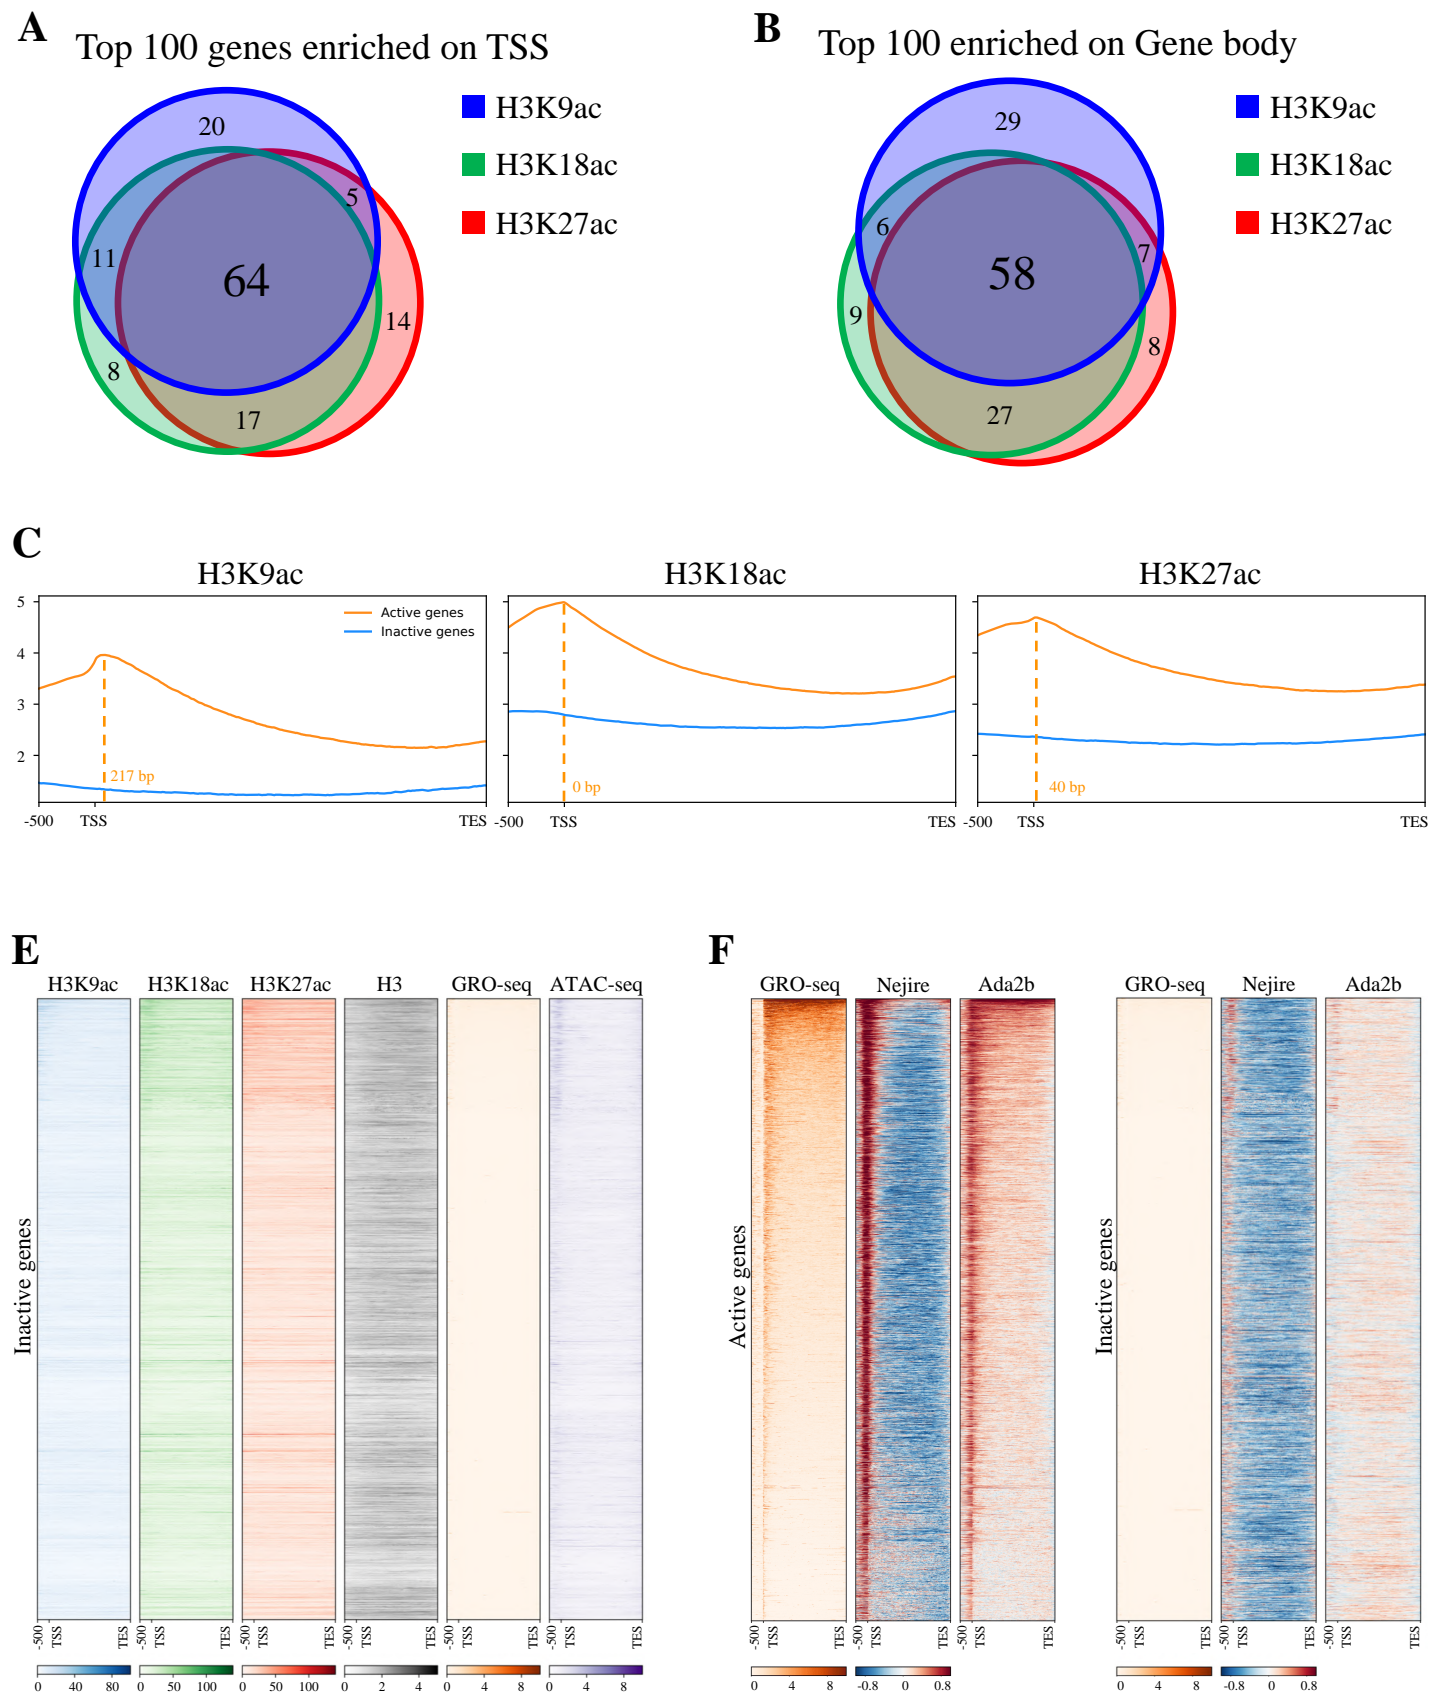

**Fig. S5. H3K9-, H3K18- and H3K27ac marks and their writers are specifically deposited on active genes.** (A and B) Venn diagram displaying the overlap among the top 100 active genes enriched for H3K9ac (blue), H3K18ac (green) and H3K27ac (red) marks, normalized by total H3 levels, in the genomic region spanning around their TSS (200 bp upstream TSS to 200 bp upstream TSS) (A) or on their gene body (from 200 bp downstream of TSS to TES) (B). (C) Metagene profiles of H3 normalized H3K9ac (left), H3K18ac (center) and H3K27ac (right) marks, showing active genes (orange) and inactive genes (blue) at ZGA from 500 bp upstream the TSS to TES. Numbers in orange indicate the distance from the TSS to the peak. Numbers on Y-axis indicate the mean coverage of log<sub>2</sub> of the corresponding H3 normalized acetylation marks. (D) Heatmaps of ZGA (stage 5) inactive genes defined by lack of a GRO-seq and PolIII signals spanning from 500 bp upstream of TSS to TES. Genes are ranked according to their GRO-seq signal in column 5 (orange). Columns represent wild-type embryos H3K9ac CUT&Tag (blue), H3K18ac CUT&Tag (green), H3K27ac CUT&Tag (red), H3 CUT&Tag (grey), GRO-seq (orange), ATAC-seq (purple) (15). Corresponding color-coded scale bars are depicted on the bottom (n = 2 biological replicates from independent embryo collections). (E) Heatmaps of active genes (left) and inactive genes (right) spanning from 500 bp upstream of TSS to TES during ZGA. Genes are ranked according to their GRO-seq signal in column 1 (orange). Column 2 shows Nejire ChIP signal from (48). Column 3 shows Ada2b signal (SAGA component) from (35). Corresponding color-coded scale bars are depicted on the bottom (n = 2 biological replicates from independent embryo collections).

# Supplementary Data Figure 6

**A**

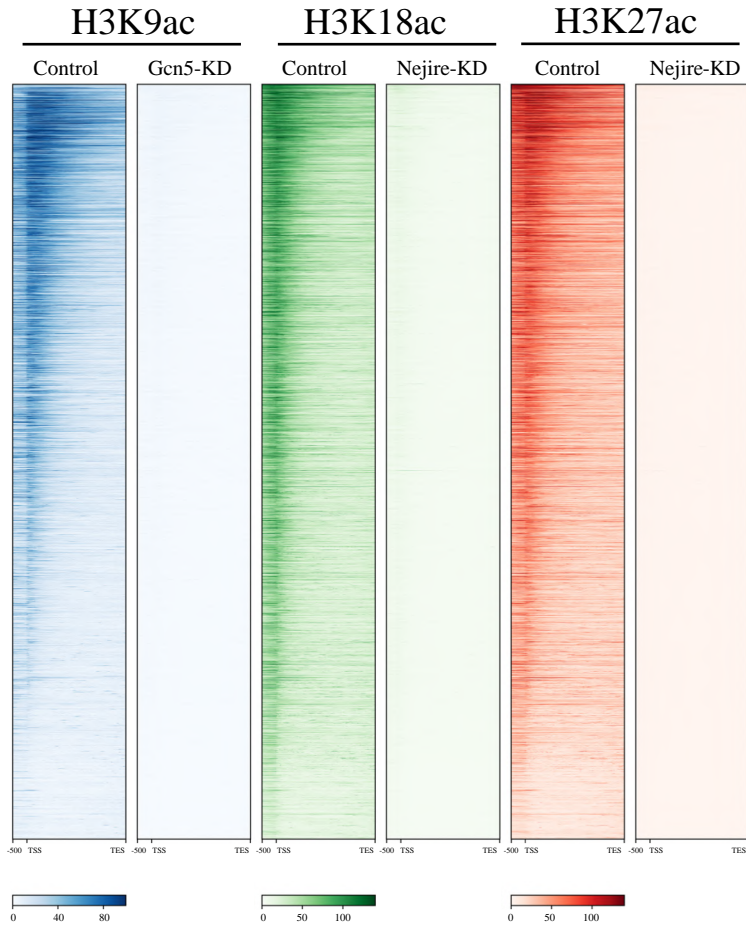

**B**

- Top 500 genes downregulated in Gcn5-KD
- Top 500 genes enriched for H3K9ac on gene body

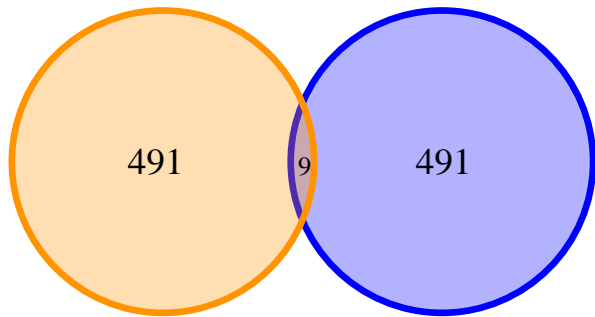

**C**

- Top 500 genes downregulated in Gcn5-KD
- Top 500 genes enriched for H3K9ac on TSS

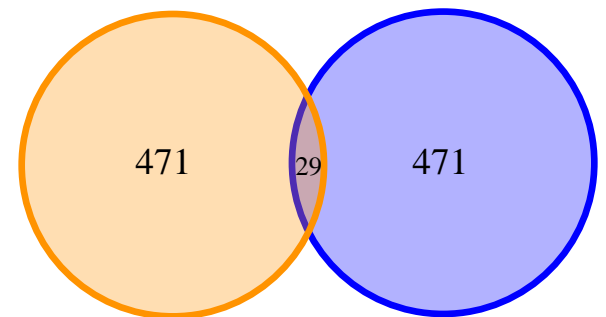

**D**

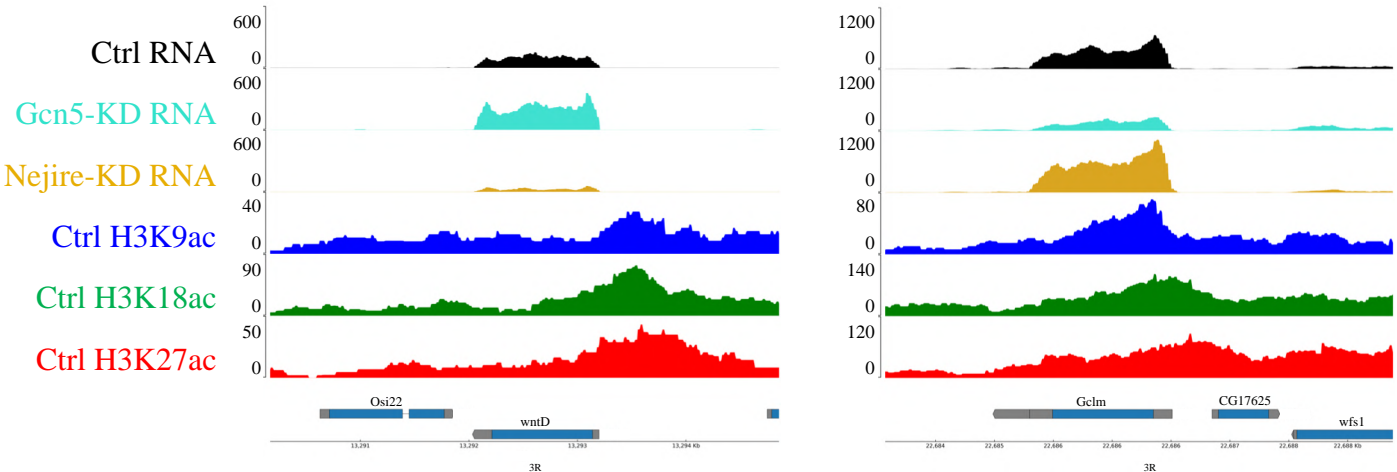

**Fig. S6. Nejire and Gcn5 deposit their acetylation marks on every active gene, independently of their transcriptional coactivator activities.** (A) Heatmaps of ZGA (stage 5) active genes defined by a GRO-seq signal (15) spanning from 500 bp upstream of TSS to TES. H3K9ac (blue), H3K18ac (green) and H3K27ac (red) marks are shown in control embryos on the left and in their corresponding knockdown on the right. Corresponding color-coded scale bars are depicted on the bottom (n = 2 biological replicates from independent embryo collections). (B and C) Venn diagram displaying the overlap among the top 500 genes enriched for H3K9ac mark normalized by total H3 (blue) on their gene body (from 200 bp downstream of TSS to TES) (B) or on their TSS (200 bp upstream TSS to 200 bp upstream TSS) (C) with the top 500 genes downregulated in Gcn5-KD compared to control in RNA-seq experiments during ZGA. (D) IGV gene browser views of a representative Nejire-dependent gene (*wntD*) on the left and a representative Gcn5-dependent gene (*Gclm*) on the right. For each genomic region, control RNA-seq (black), Gcn5-KD RNA-seq (cyan), Nejire-KD RNA-seq (gold), H3K9ac (blue), H3K18ac (green), and H3K27ac (red) CUT&Tag are displayed from top to bottom. Genomic coordinates are indicated above the panel.

# Supplementary Data Figure 7

**A**

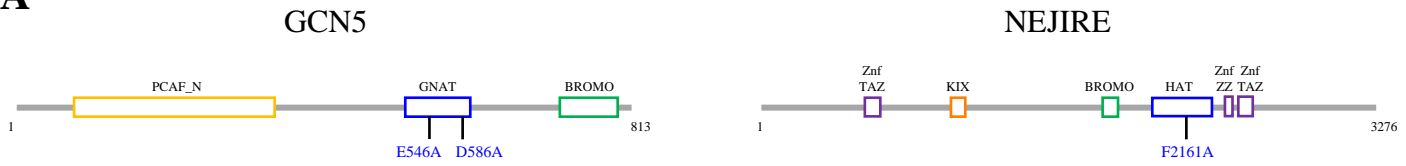

**B**

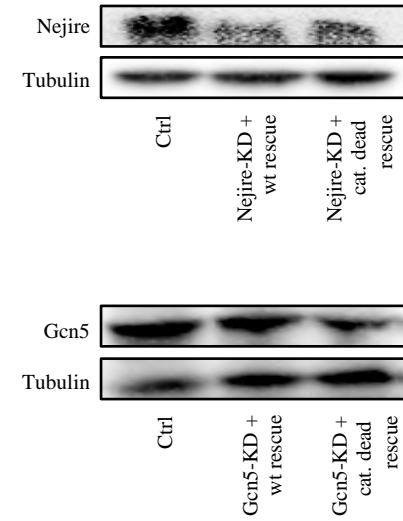

**C**

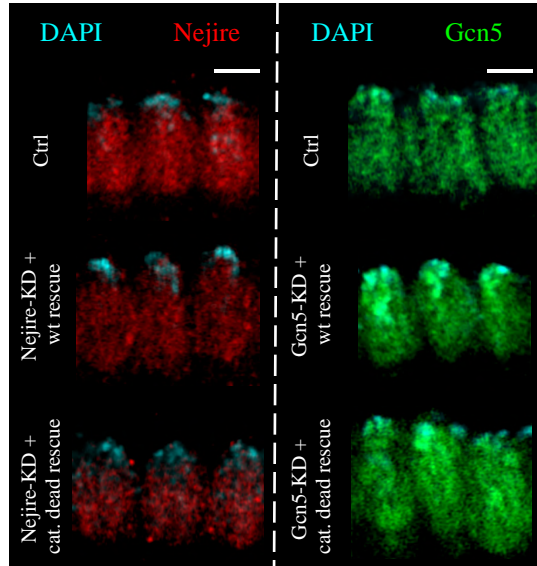

**D**

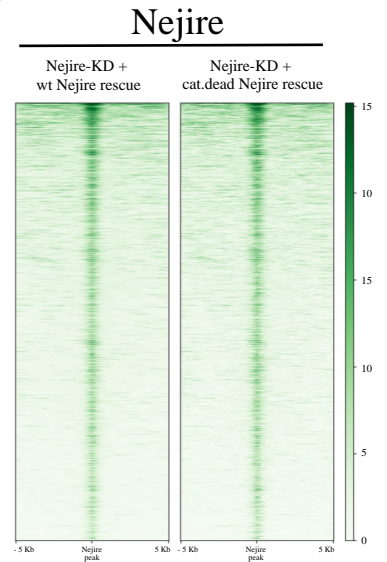

**E**

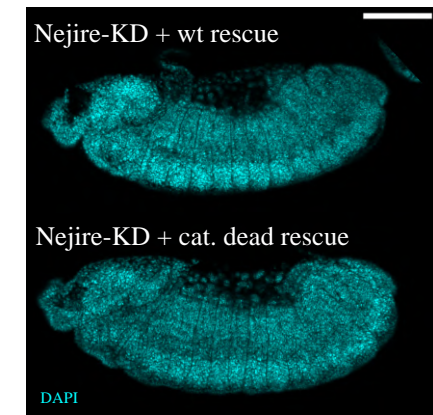

**F**

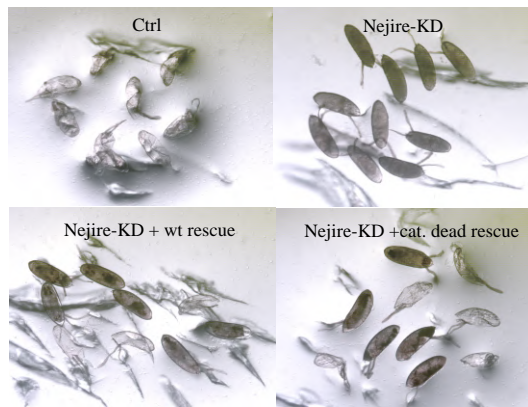

**Gcn5**

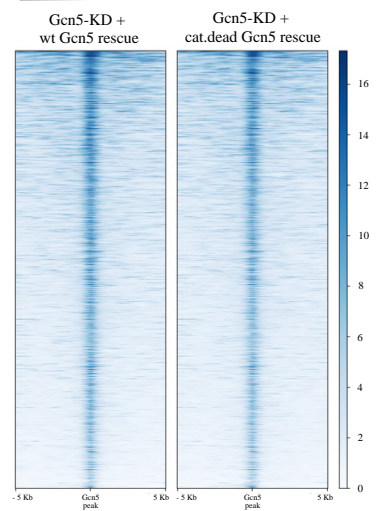

**G**

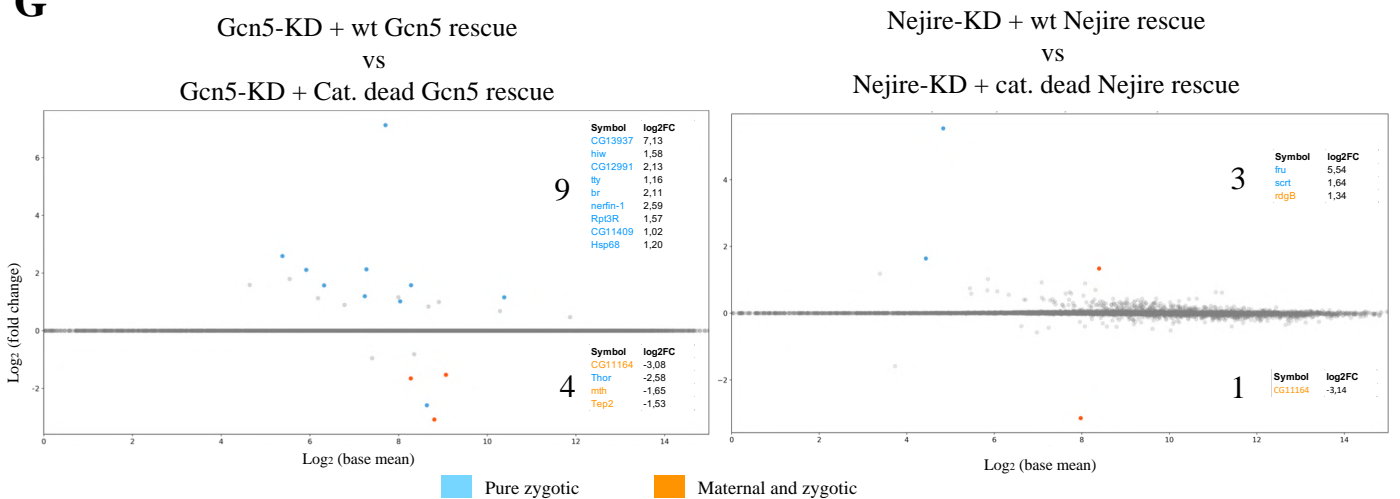

**Fig. S7. Nejire and Gcn5 catalytic activities are not required for embryonic development.** (A) Representation of Gcn5 and Nejire protein products with their corresponding domains. Numbers indicate aminoacidic positions. In blue, the aminoacidic substitutions in the catalytically dead constructs within the HAT domains. (B) Western blot assays performed with total protein extracts from ZGA embryos. On the top, anti-Nejire and anti-Tubulin, on the bottom, anti-Gcn5 and anti-tubulin signals are compared in control, wild-type rescue and catalytically dead rescue embryonic extracts. (C) Representative immunofluorescence pictures of ZGA embryos. On the left, anti-Nejire staining (red) and on the right, anti-Gcn5 staining (green), are coupled with DAPI staining (cyan). (scale bar = 5  $\mu$ m). (D) Heatmaps of ZGA CUT&Tag experiments performed in ZGA embryos, comparing wild type rescue and on the left and catalytically dead rescues on the right of Nejire-KD (top) and Gcn5-KD (bottom), respectively. Signal span 5 Kb upstream and 5 Kb downstream of Nejire peaks (green) on the top and Gcn5 peaks (blue) on the bottom. Corresponding color-coded scale bars are depicted on the bottom (n = 3 biological replicates from independent embryo collections) (E) DAPI staining of representative embryos during the beginning of dorsal closure (stage 14). Nejire-KD embryos coupled on the left with wild-type Nejire rescue or with Nejire catalytically dead rescue on the right. Scale bar = 100  $\mu$ m. (F) Pictures of holocarbon oil-immersed embryos, 25 hours after egg deposition in the corresponding conditions. Empty cases correspond to hatched embryos. Abdominal segments are visible in embryos that died at late stages of embryogenesis (G) MA plots of RNA-seq experiments from total RNA in ZGA embryos, comparing the indicated conditions. The number of significantly upregulated and downregulated genes (adjusted  $p$ -value  $\leq 0.05$  and  $\log_2$  FC  $< -1$  or  $\log_2$ FC  $> 1$ ) is shown above or below the  $\log_2$ FC mean expression = 0 line, respectively. The affected genes are listed on the right and they are highlighted in blue if “pure zygotic” or in orange if “maternal and zygotic” (see fig. S2A for details on classification).

# Supplementary Data Figure 8

**A**

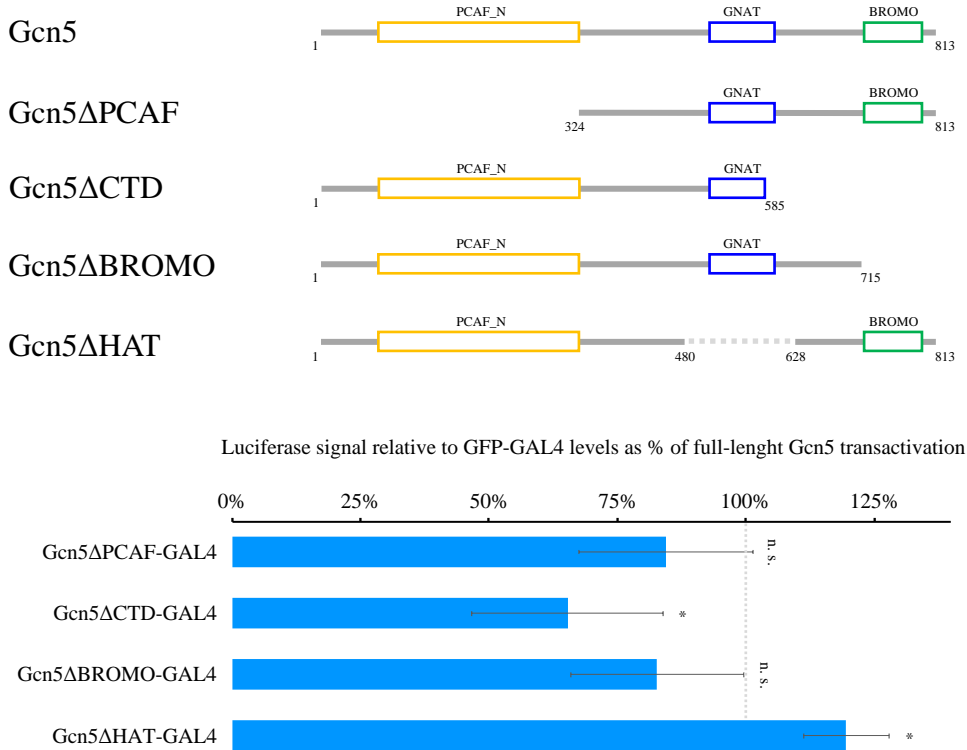

**B**

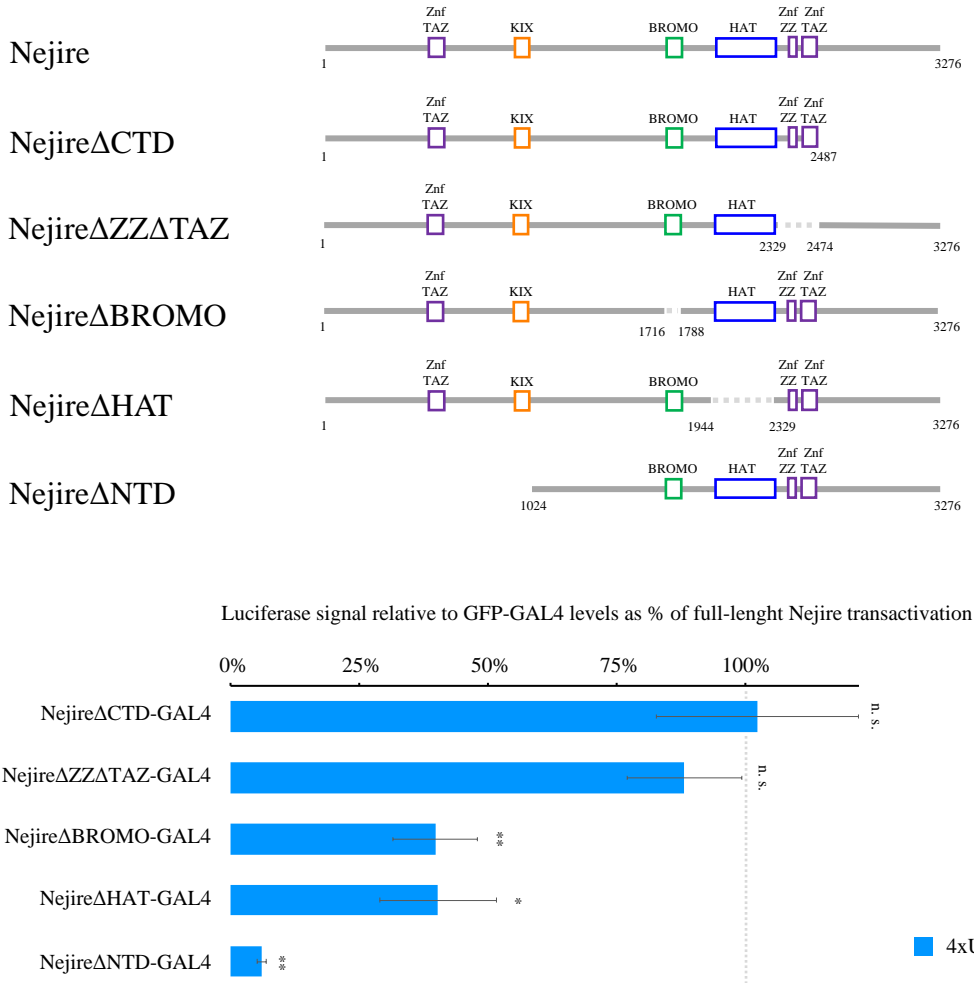



**Fig. S8. Nejire N-terminal domain is crucial for *in vitro* transactivation. (A,B)** On the top, Gcn5 (A) and Nejire (B) schematics of truncated protein variants. Numbers represent aminoacidic position in full-length protein. Domains are highlighted in colors. On the bottom, the results of *firefly* luciferase transactivation assay upon the recruitment of Gcn5 variants (A) and Nejire variants (B), using a developmental core promoter. The *firefly* luciferase signal is normalized to the *renilla* luciferase signal expressed from a constitutive promoter to control for transfection efficiency. Signals are further normalized to GFP-GAL4DBD as negative control. Finally, the relative GFP for each transfection replicate is normalized to full-length Gcn5 (A) or Nejire (B) transactivation levels. For each independent transfection replicate, three technical measurement replicates were averaged. Data are represented as mean and standard deviation of  $n = 4$  transfection replicates. Paired, two-tailed Student's *t*-Test was applied to compare the GFP-GAL4DBD relative *firefly/renilla* luciferase levels with the other conditions (\*  $p$ -value  $\leq 0.05$ , \*\*  $p$ -value  $\leq 0.01$ , \*\*\*  $p$ -value  $\leq 0.001$ ).

**Table S1. Screen results of maternal knockdown of chromatin factor**

| #   | Symbol     | ID line  | Type | CR    | HR    | PCLR   | Eggs     | Category                     |
|-----|------------|----------|------|-------|-------|--------|----------|------------------------------|
| 1   | GAF        | 67265    | V20  | 48.0% | 0.0%  | 100.0% | abnormal | Chromatin Structure/Topology |
| 2   | Pita       | 57732    | V20  | 45.8% | 0.0%  | 100.0% |          | Chromatin Structure/Topology |
| 3   | HDAC3      | 34778    | V20  | 44.6% | 0.0%  | 100.0% |          | Histone Acetylation          |
| 4   | nej        | homemade | V20  | 35.0% | 0.0%  | 100.0% |          | Histone Acetylation          |
| 5   | E(z)       | 33659    | V20  | 32.5% | 0.0%  | 100.0% |          | Polycomb group/H3K27me3      |
| 6   | CtBP       | 32889    | V20  | 31.7% | 0.0%  | 100.0% |          | Chromatin Remodelling        |
| 7   | chm        | 32484    | V20  | 29.2% | 0.0%  | 100.0% |          | Histone Acetylation          |
| 8   | Gag        | 32961    | V20  | 15.0% | 0.0%  | 100.0% |          | Transcriptional Corepressor  |
| 9   | ZIPIC      | 64552    | V20  | 13.3% | 0.0%  | 100.0% |          | Chromatin Structure/Topology |
| 10  | domino     | 41674    | V20  | 11.1% | 0.0%  | 100.0% | abnormal | Chromatin Remodelling        |
| 11  | Brel1      | 35443    | V22  | 9.0%  | 0.0%  | 100.0% | abnormal | Thritorax group/H3K4me3      |
| 12  | trr        | 36916    | V20  | 3.3%  | 0.0%  | 100.0% | abnormal | Thritorax group/H3K4me3      |
| 13  | Chd1       | 34665    | V20  | 2.9%  | 0.0%  | 100.0% | abnormal | Chromatin Remodelling        |
| 14  | egg        | 32445    | V20  | 2.5%  | 0.0%  | 100.0% |          | Heterochromatin/H3K9me3      |
| 15  | HDAC1      | 33725    | V20  | 51.3% | 0.3%  | 99.5%  |          | Histone Acetylation          |
| 16  | nurf38     | 35444    | V22  | 3.3%  | 0.4%  | 87.5%  |          | Chromatin Remodelling        |
| 17  | Gcn5       | 35601    | V20  | 25.1% | 3.9%  | 84.5%  |          | Histone Acetylation          |
| 18  | Pse        | 38261    | V20  | 49.2% | 7.8%  | 84.2%  |          | Polycomb group/H3K27me3      |
| 19  | Hp1a       | 36792    | V22  | 43.6% | 8.3%  | 80.9%  |          | Heterochromatin/H3K9me3      |
| 20  | upSET      | 51447    | V20  | 43.3% | 8.8%  | 79.8%  | abnormal | Thritorax group/H3K4me3      |
| 21  | taf1       | 32421    | V20  | 22.7% | 5.1%  | 77.6%  | abnormal | Histone Acetylation          |
| 22  | esul       | 56978    | V20  | 63.3% | 20.4% | 67.8%  |          | Arginine methyltransferase   |
| 23  | SMC2       | 32369    | V20  | 1.7%  | 0.6%  | 66.6%  |          | Chromatin Structure/Topology |
| 24  | DMAPI      | 63666    | V20  | 42.0% | 14.2% | 66.3%  | abnormal | Chromatin Remodelling        |
| 25  | Scm        | 55278    | V20  | 24.0% | 8.7%  | 63.9%  |          | Polycomb group/H3K27me3      |
| 26  | msl-1      | 29012    | V20  | 23.3% | 10.0% | 57.1%  |          | Histone Acetylation          |
| 27  | SMC5       | 56035    | V20  | 65.7% | 29.4% | 55.3%  |          | Chromatin Structure/Topology |
| 28  | bigH1      | 34548    | KK   | 35.0% | 17.5% | 50.0%  |          | Chromatin Structure/Topology |
| 29  | Chro       | 57470    | V20  | 95.0% | 48.5% | 49.0%  |          | Chromatin Structure/Topology |
| 30  | Mod(mdg4)  | 32995    | V20  | 0.8%  | 0.4%  | 47.9%  | abnormal | Chromatin Structure/Topology |
| 31  | ash2       | 64942    | V20  | 33.0% | 17.6% | 46.8%  |          | Thritorax group/H3K4me3      |
| 32  | su(Hw)     | 34006    | V20  | 53.3% | 28.7% | 46.1%  |          | Chromatin Structure/Topology |
| 33  | dwg        | 35666    | V22  | 9.4%  | 5.3%  | 44.0%  |          | Chromatin Structure/Topology |
| 34  | kis        | 34908    | V20  | 87.5% | 50.8% | 42.0%  |          | Chromatin Remodelling        |
| 35  | Pc         | 36070    | V22  | 24.2% | 14.2% | 41.5%  |          | Polycomb group/H3K27me3      |
| 36  | Nap1       | 35445    | V22  | 65.0% | 41.1% | 36.8%  |          | Chromatin Remodelling        |
| 37  | BRWD3      | 33421    | V20  | 45.6% | 28.8% | 36.7%  |          | Histone Acetylation          |
| 38  | ash1       | 36803    | V22  | 60.0% | 38.0% | 36.7%  |          | Thritorax group/H3K4me3      |
| 39  | Ari3       | 109448   | KK   | 37.5% | 24.4% | 34.8%  |          | Arginine methyltransferase   |
| 40  | calypto    | 56888    | V20  | 72.5% | 47.9% | 33.9%  |          | Polycomb group/H3K27me3      |
| 41  | trx        | 33703    | V20  | 59.2% | 39.6% | 33.1%  |          | Thritorax group/H3K4me3      |
| 42  | car        | 34798    | V20  | 65.0% | 44.2% | 32.1%  |          | Transcriptional Coactivator  |
| 43  | Sec        | 35446    | V22  | 35.8% | 24.6% | 31.4%  |          | Polycomb group/H3K27me3      |
| 44  | enok       | 41664    | V20  | 36.3% | 25.4% | 29.9%  |          | Histone Acetylation          |
| 45  | Sirt1      | 32481    | V20  | 57.5% | 40.6% | 29.5%  |          | Histone Acetylation          |
| 46  | Set1       | 33704    | V20  | 26.7% | 18.9% | 29.2%  | abnormal | Thritorax group/H3K4me3      |
| 47  | ttk        | 36748    | V20  | 80.0% | 56.8% | 29.0%  |          | Chromatin Remodelling        |
| 48  | mof        | 58281    | V20  | 52.5% | 37.5% | 28.6%  |          | Histone Acetylation          |
| 49  | Utx        | 34076    | V20  | 47.5% | 34.4% | 27.5%  |          | Thritorax group/H3K4me3      |
| 50  | gro        | 35759    | V20  | 1.7%  | 1.3%  | 26.7%  |          | Transcriptional Corepressor  |
| 51  | HDAC11     | 32480    | V20  | 46.3% | 34.0% | 26.6%  |          | Histone Acetylation          |
| 52  | Brd8       | 42658    | V20  | 83.0% | 61.0% | 26.6%  |          | Histone Acetylation          |
| 53  | Su(var)3-3 | 32853    | V20  | 61.0% | 45.7% | 25.1%  |          | Heterochromatin/H3K9me3      |
| 54  | PR-Set7    | 35322    | V22  | 18.1% | 13.7% | 24.3%  |          | Heterochromatin/H3K9me3      |
| 55  | gpp        | 34842    | V20  | 6.0%  | 4.6%  | 23.0%  | abnormal | SET domain protein           |
| 56  | Ph         | 63018    | V20  | 70.8% | 55.4% | 21.8%  |          | Polycomb group/H3K27me3      |
| 57  | Sin3A      | 32368    | V20  | 57.5% | 45.0% | 21.7%  |          | Histone Acetylation          |
| 58  | Jarid2     | 32891    | V20  | 11.7% | 9.2%  | 21.4%  |          | Polycomb group/H3K27me3      |
| 59  | bbx        | 57553    | V20  | 75.8% | 60.6% | 20.1%  |          | HMG box protein              |
| 60  | bon        | 37515    | V20  | 85.0% | 68.3% | 19.6%  |          | Heterochromatin/H3K9me3      |
| 61  | SMC1       | 108922   | KK   | 26.7% | 22.1% | 17.2%  |          | Chromatin Structure/Topology |
| 62  | Hmt4-20    | 32892    | V20  | 76.6% | 63.9% | 16.6%  |          | Heterochromatin/H3K9me3      |
| 63  | Ntmt       | 110351   | KK   | 92.0% | 77.5% | 15.8%  |          | H2B methylation              |
| 64  | Sirt7      | 32483    | V20  | 73.5% | 62.3% | 15.2%  |          | Histone Acetylation          |
| 65  | Smyd4-1    | 106709   | KK   | 87.5% | 74.4% | 14.9%  |          | SET domain protein           |
| 66  | CoRest     | 104900   | KK   | 63.3% | 54.2% | 14.5%  |          | Heterochromatin/H3K9me3      |
| 67  | Sox14      | 34794    | V20  | 92.5% | 79.2% | 14.4%  |          | HMG box protein              |
| 68  | Ari4       | 36833    | V22  | 83.3% | 71.7% | 14.0%  | abnormal | Arginine methyltransferase   |
| 69  | top3       | 108258   | KK   | 76.7% | 66.0% | 13.9%  | abnormal | Chromatin Structure/Topology |
| 70  | ctcf       | 40850    | V20  | 62.5% | 53.9% | 13.8%  |          | Chromatin Structure/Topology |
| 71  | HmgD       | 77429    | V20  | 79.2% | 68.3% | 13.7%  |          | Chromatin Structure/Topology |
| 72  | HDAC6      | 34072    | V20  | 35.3% | 30.6% | 13.3%  |          | Histone Acetylation          |
| 73  | G9a        | 34817    | V20  | 70.8% | 61.7% | 12.9%  |          | Heterochromatin/H3K9me3      |
| 74  | Brl140     | 42502    | V20  | 84.2% | 73.3% | 12.9%  |          | Histone Acetylation          |
| 75  | Elba2      | 61903    | V20  | 94.2% | 82.2% | 12.7%  |          | Chromatin Structure/Topology |
| 76  | E(Pe)      | 67921    | V20  | 6.0%  | 5.3%  | 12.4%  | abnormal | Chromatin Remodelling        |
| 77  | Acf        | 35575    | V22  | 80.8% | 70.8% | 12.4%  |          | Chromatin Remodelling        |
| 78  | msl-2      | 35390    | V22  | 74.2% | 65.0% | 12.4%  |          | Histone Acetylation          |
| 79  | Sirt4      | 33984    | V20  | 41.0% | 36.0% | 12.2%  |          | Histone Acetylation          |
| 80  | HP1c       | 33962    | V20  | 92.5% | 82.2% | 11.1%  |          | Heterochromatin/H3K9me3      |
| 81  | Ino80      | 35708    | V20  | 60.8% | 54.2% | 11.0%  | abnormal | Chromatin Remodelling        |
| 82  | Iswi       | 32845    | V20  | 58.3% | 52.1% | 10.7%  |          | Chromatin Remodelling        |
| 83  | Ari8       | 20307    | GD   | 89.2% | 80.3% | 10.0%  |          | Arginine methyltransferase   |
| 84  | Kdm4A      | 34629    | V20  | 85.0% | 76.7% | 9.8%   |          | Heterochromatin/H3K9me3      |
| 85  | Kdm4B      | 62409    | V20  | 78.3% | 70.8% | 9.6%   |          | Heterochromatin/H3K9me3      |
| 86  | dikar      | 58280    | V20  | 55.8% | 51.1% | 8.4%   | abnormal | Histone Acetylation          |
| 87  | lid        | 36652    | V22  | 87.5% | 80.6% | 7.9%   |          | Transcriptional Corepressor  |
| 88  | ben32      | 35642    | V21  | 27.5% | 25.4% | 7.6%   |          | Chromatin Structure/Topology |
| 89  | NSD        | 34033    | V20  | 5.8%  | 5.4%  | 7.1%   |          | SET domain protein           |
| 90  | Chd3       | 33420    | V20  | 58.3% | 54.6% | 6.4%   |          | Chromatin Remodelling        |
| 91  | Ari7       | 36832    | V22  | 80.8% | 75.9% | 6.1%   |          | Arginine methyltransferase   |
| 92  | Atac2      | 53918    | V20  | 30.8% | 29.2% | 5.2%   | abnormal | Histone Acetylation          |
| 93  | SuUR       | 36893    | V22  | 46.7% | 44.3% | 5.1%   |          | Heterochromatin/H3K9me3      |
| 94  | Parp       | 57265    | V20  | 82.5% | 78.3% | 5.1%   |          | Chromatin Structure/Topology |
| 95  | dKDM2      | 33699    | V20  | 61.7% | 58.6% | 5.0%   | abnormal | Polycomb group/H3K27me3      |
| 96  | JIL1       | 55875    | V20  | 62.5% | 59.6% | 4.7%   |          | Kinase                       |
| 97  | Sirt6      | 34530    | V20  | 48.1% | 45.9% | 4.5%   |          | Histone Acetylation          |
| 98  | brm        | 37721    | GD   | 10.0% | 9.6%  | 4.2%   |          | Chromatin Remodelling        |
| 99  | Smyd5      | 28609    | V10  | 92.4% | 88.6% | 4.1%   |          | SET domain protein           |
| 100 | I(3)mbt    | 35052    | V20  | 72.5% | 69.6% | 4.0%   |          | Heterochromatin/H3K9me3      |
| 101 | Sirt2      | 32482    | V20  | 68.0% | 65.3% | 4.0%   |          | Histone Acetylation          |
| 102 | HDAC4      | 34774    | V20  | 62.5% | 60.0% | 4.0%   |          | Histone Acetylation          |
| 103 | set2       | 42511    | V20  | 87.8% | 84.4% | 3.9%   |          | SET domain protein           |
| 104 | CP190      | 33903    | V20  | 43.3% | 41.7% | 3.8%   |          | Chromatin Structure/Topology |
| 105 | polybromo  | 32840    | V20  | 88.3% | 85.0% | 3.8%   |          | Chromatin Remodelling        |
| 106 | MRG15      | 35241    | V22  | 95.8% | 92.5% | 3.5%   |          | Histone Acetylation          |
| 107 | cic        | 25995    | V10  | 89.2% | 86.4% | 3.1%   |          | HMG box protein              |
| 108 | tou        | 35790    | V22  | 77.0% | 75.1% | 2.5%   |          | Chromatin Remodelling        |
| 109 | E(bx)      | 33658    | V20  | 35.8% | 35.0% | 2.3%   |          | Chromatin Remodelling        |
| 110 | Hmg-2      | 42542    | V20  | 90.0% | 88.3% | 1.9%   |          | HMG box protein              |
| 111 | Smyd4-4    | 40705    | GD   | 96.7% | 95.0% | 1.7%   |          | SET domain protein           |
| 112 | CHRAC-16   | 63658    | V20  | 96.7% | 95.3% | 1.4%   |          | Chromatin Remodelling        |
| 113 | CONTROL    | 36303    | -    | 98.3% | 96.9% | 1.4%   |          | -                            |
| 114 | rhi        | 35171    | V22  | 0.8%  | 0.8%  | 0.0%   | abnormal | Heterochromatin/H3K9me3      |
| 115 | Cdk1       | 36117    | V20  | 0.0%  | 0.0%  | 0.0%   | abnormal | Kinase                       |
| 116 | fs(1)Ya    | 64597    | V20  | 0.0%  | 0.0%  | 0.0%   |          | Histone Acetylation          |
| 117 | Top2       | 35416    | V22  | 0.0%  | 0.0%  | 0.0%   |          | Chromatin Structure/Topology |
| 118 | scrawny    | 40865    | V20  | -     | -     | -      | no eggs  | Thritorax group/H3K4me3      |
| 119 | Ttk        | 33983    | V20  | -     | -     | -      | no eggs  | Kinase                       |
| 120 | fs(1)h     | 35139    | V22  | -     | -     | -      | no eggs  | Histone Acetylation          |
| 121 | Mi-2       | 33419    | V20  | -     | -     | -      | no eggs  | Chromatin Remodelling        |
| 122 | Sfmbt      | 32473    | V20  | -     | -     | -      | no eggs  | Polycomb group/H3K27me3      |
| 123 | Top1       | 55314    | V20  | -     | -     | -      | no eggs  | Chromatin Structure/Topology |
| 124 | D12        | 65062    | V20  | -     | -     | -      | no eggs  | Histone Acetylation          |
| 125 | piwi       | 33724    | V20  | -     | -     | -      | no eggs  | Heterochromatin/H3K9me3      |
| 126 | dre4       | 41677    | V20  | -     | -     | -      | no eggs  | Chromatin Remodelling        |
| 127 | Ssrp       | 41719    | V20  | -     | -     | -      | no eggs  | Chromatin Remodelling        |

**Table S2. List of antibodies used in this work**

| Antigen          | Antibody name                                                                          | Host              | Source                                        |
|------------------|----------------------------------------------------------------------------------------|-------------------|-----------------------------------------------|
| H3K9ac           | H3K9ac - EpiCypher SNAP-ChIP                                                           | Rabbit monoclonal | EpiCypher (BioCat)                            |
| H3K18ac          | Histone H3K18ac antibody (pAb)                                                         | Rabbit polyclonal | Active Motif                                  |
| H3K27ac          | Anti-acetyl Histone H3(Lys27) (Clone No MABI0309)                                      | Mouse monoclonal  | Wako                                          |
| H3K23ac          | Histone H3K23ac antibody (pAb)                                                         | Rabbit polyclonal | Active Motif                                  |
| H3               | Histone H3 Antibody (ChIP Formulated)                                                  | Rabbit polyclonal | Cell Signaling                                |
| H4               | HRP Anti-Histone H4 antibody [mAbcam 31830]                                            | Mouse monoclonal  | Abcam                                         |
| Nejire           | anti-CBP                                                                               | Rabbit polyclonal | Nadezhda E. Vorobyeva (homemade)              |
| Gcn5             | anti-Gcn5                                                                              | Rabbit polyclonal | Aleksey N. Krasnov (homemade)                 |
| GAF              | anti-GAF                                                                               | Rabbit polyclonal | Maxim Erokhin and Daria Chetverina (homemade) |
| Zelda            | rZld                                                                                   | Rabbit polyclonal | Melissa M. Harrison (homemade)                |
| HA               | Anti-HA.11 Epitope Tag Antibody                                                        | Mouse monoclonal  | Covance                                       |
| rabbit IgG (H+L) | F(ab')2-Goat anti-Rabbit IgG (H+L) Cross-Adsorbed Secondary Antibody, Alexa Fluor™ 488 | Goat polyclonal   | Molecular Probes by ThermoScientific          |
| mouse IgG (H+L)  | F(ab')2-Goat anti-Mouse IgG (H+L) Cross-Adsorbed Secondary Antibody, Alexa Fluor™ 555  | Goat polyclonal   | Molecular Probes by ThermoScientific          |

| Antigen          | Catalog number or reference                                                                                                                           | Lot number  | conc. used for IF | conc. used for WB | quantity for Cut&Tag |
|------------------|-------------------------------------------------------------------------------------------------------------------------------------------------------|-------------|-------------------|-------------------|----------------------|
| H3K9ac           | 13-0033                                                                                                                                               | 19091001    | 1 to 200          | 1 to 1000         | 1µg                  |
| H3K18ac          | 39587                                                                                                                                                 | 7909001     | 1 to 200          | 1 to 5000         | 1µg                  |
| H3K27ac          | 306-34849                                                                                                                                             | 11003       | 1 to 100          | 1 to 1000         | 1µg                  |
| H3K23ac          | 39131                                                                                                                                                 | 1008001     | 1 to 200          | -                 | 1µg                  |
| H3               | #2650                                                                                                                                                 | 4           | -                 | -                 | 1µg                  |
| H4               | ab197517                                                                                                                                              | GR3357384-5 | -                 | 1 to 1000         | -                    |
| Nejire           | <a href="https://www.sciencedirect.com/science/article/pii/S1874939917302924">https://www.sciencedirect.com/science/article/pii/S1874939917302924</a> | -           | 1 to 200          | 1 to 500          | -                    |
| Gcn5             | <a href="https://academic.oup.com/nar/article/41/11/5717/2411603">https://academic.oup.com/nar/article/41/11/5717/2411603</a>                         | -           | 1 to 200          | 1 to 500          | 1µg                  |
| GAF              | <a href="https://www.pnas.org/doi/10.1073/pnas.1515276112">https://www.pnas.org/doi/10.1073/pnas.1515276112</a>                                       | -           | 1 to 100          | 1 to 200          | -                    |
| Zelda            | <a href="https://doi.org/10.1016/j.ydbio.2010.06.026">https://doi.org/10.1016/j.ydbio.2010.06.026</a>                                                 | -           | 1 to 200          | 1 to 200          | -                    |
| HA               | MMS101R                                                                                                                                               | B224726     | -                 | -                 | 1µg                  |
| rabbit IgG (H+L) | A11070                                                                                                                                                | 1775509     | 1 to 500          | -                 | -                    |
| mouse IgG (H+L)  | A21425                                                                                                                                                | 1874003A    | 1 to 500          | -                 | -                    |
